# Supplementary material
Source: ML conference proceedings conference paper supplement (https://proceedings.mlr.press/v80/kangarshahi18a.html)
Supplement: Supplementary file [file kangarshahi18a-supp.pdf]

---

# Appendix for “Let’s be Honest: An Optimal No-Regret Framework for Zero-Sum Games”

---

Ehsan Asadi Kangarshahi <sup>\*1</sup> Ya-Ping Hsieh <sup>\*1</sup> Mehmet Fatih Sahin <sup>1</sup> Volkan Cevher <sup>1</sup>

## A. Equivalence Formulations of Optimistic Mirror Descent

In this appendix, we show that the  $\mathbf{x}_t$  iterates in (2) of the main text is equivalent to the following iterates given in (Chiang et al., 2012; Rakhlin & Sridharan, 2013):

$$\begin{cases} \mathbf{x}_t &= MD_\eta(\tilde{\mathbf{x}}_t, -\mathbf{A}\mathbf{y}_{t-1}) \\ \tilde{\mathbf{x}}_{t+1} &= MD_\eta(\tilde{\mathbf{x}}_t, -\mathbf{A}\mathbf{y}_t) \end{cases}. \quad (\text{A.1})$$

By the optimality condition for (A.1), we have

$$\nabla\psi(\mathbf{x}_t) = \nabla\psi(\tilde{\mathbf{x}}_t) - \eta(-\mathbf{A}\mathbf{y}_{t-1}), \quad (\text{A.2})$$

$$\nabla\psi(\tilde{\mathbf{x}}_t) = \nabla\psi(\tilde{\mathbf{x}}_{t-1}) - \eta(-\mathbf{A}\mathbf{y}_{t-1}), \quad (\text{A.3})$$

$$\nabla\psi(\tilde{\mathbf{x}}_{t-1}) = \nabla\psi(\mathbf{x}_{t-1}) + \eta(-\mathbf{A}\mathbf{y}_{t-2}). \quad (\text{A.4})$$

We hence get (2) by applying (A.4) to (A.3) and then (A.3) to (A.2).

## B. Optimistic Mirror Descent

In this appendix, we prove **Theorem 2**, restated below for convenience.

**Theorem 1.** *Suppose two players of a zero-sum game have played  $T$  rounds according to **Algorithm 1** and **2** with  $\eta = \frac{1}{2|A|_{\max}}$ . Then*

1. *The  $\mathbf{x}$ -player suffers a  $O\left(\frac{\log(T)}{T}\right)$  regret:*

$$\begin{aligned} \max_{\mathbf{z} \in \Delta_m} \sum_{t=3}^T \langle \mathbf{z}_t - \mathbf{z}, -\mathbf{A}\mathbf{w}_t \rangle &\leq \left( \log(T-2) + 1 \right) \left( 20 + \log m + \log n \right) |A|_{\max} \\ &= O(\log T) \end{aligned} \quad (\text{B.1})$$

*and similarly for the  $\mathbf{y}$ -player.*

2. *The strategies  $(\mathbf{z}_T, \mathbf{w}_T)$  constitutes an  $O\left(\frac{1}{T}\right)$ -approximate equilibrium to the value of the game:*

$$|V - \langle \mathbf{z}_T, \mathbf{A}\mathbf{w}_T \rangle| \leq \frac{\left( 20 + \log m + \log n \right) |A|_{\max}}{T-2} = O\left(\frac{1}{T}\right). \quad (\text{B.2})$$

---

<sup>\*</sup>Equal contribution <sup>1</sup>LIONS, EPFL, Switzerland. Correspondence to: Ya-Ping Hsieh <ya-ping.hsieh@epfl.ch>, Volkan Cevher <volkan.cevher@epfl.ch>.

*Proof.* Define  $\mathbf{x}^*$  as

$$\mathbf{x}^* = \arg \min_{\mathbf{x} \in \Delta_m} \left\langle \mathbf{x}, -A \left( \frac{1}{T-2} \sum_{t=3}^T \mathbf{y}_t \right) \right\rangle. \quad (\text{B.3})$$

We define an auxiliary individual regret  $\mathbf{R}_T^{\mathbf{x}}$  as

$$\mathbf{R}_T^{\mathbf{x}} := \sum_{t=3}^T \langle \mathbf{x}_t - \mathbf{x}^*, -A\mathbf{y}_t \rangle. \quad (\text{B.4})$$

Notice that this is the regret on the  $\mathbf{x}_t$  sequence versus  $\mathbf{y}_t$  sequence, while we are playing  $\mathbf{z}_t$ 's and  $\mathbf{w}_t$ 's in the algorithm.

We then have

$$\begin{aligned} \mathbf{R}_T^{\mathbf{x}} &= \sum_{t=3}^T \langle \mathbf{x}_t - \mathbf{x}^*, -A\mathbf{y}_t \rangle \\ &= \langle \mathbf{x}_3 - \mathbf{x}^*, -A\mathbf{y}_3 \rangle + \sum_{t=4}^T \langle \mathbf{x}_t - \mathbf{x}^*, -A\mathbf{y}_t \rangle \\ &\leq 2|A|_{\max} + \sum_{t=4}^T \langle \mathbf{x}_t - \mathbf{x}^*, -A\mathbf{y}_t - \mathbf{g}_{t-1} \rangle + \sum_{t=4}^T \langle \mathbf{x}_t - \mathbf{x}^*, \mathbf{g}_{t-1} \rangle \end{aligned}$$

where  $\mathbf{g}_t := -2(t-2)A\mathbf{w}_t + 3(t-3)A\mathbf{w}_{t-1} - (t-4)A\mathbf{w}_{t-2}$ . Inserting  $\mathbf{w}_t = \frac{1}{t-2} \sum_{i=3}^t \mathbf{y}_i$  into the definition of  $\mathbf{g}_t$ , we get  $\mathbf{g}_t = -2A\mathbf{y}_t + A\mathbf{y}_{t-1}$ . Straightforward calculation then shows:

$$\begin{aligned} \mathbf{R}_T^{\mathbf{x}} &\leq 2|A|_{\max} + \sum_{t=4}^T \langle \mathbf{x}_t - \mathbf{x}^*, -A\mathbf{y}_t + 2A\mathbf{y}_{t-1} - A\mathbf{y}_{t-2} \rangle + \sum_{t=4}^T \langle \mathbf{x}_t - \mathbf{x}^*, -2A\mathbf{y}_{t-1} + A\mathbf{y}_{t-2} \rangle \\ &= 2|A|_{\max} + \sum_{t=4}^T \langle \mathbf{x}_t - \mathbf{x}^*, (-A\mathbf{y}_t + A\mathbf{y}_{t-1}) - (-A\mathbf{y}_{t-1} + A\mathbf{y}_{t-2}) \rangle \\ &\quad + \frac{1}{\eta} \sum_{t=4}^T \left( D(\mathbf{x}^*, \mathbf{x}_{t-1}) - D(\mathbf{x}^*, \mathbf{x}_t) - D(\mathbf{x}_t, \mathbf{x}_{t-1}) \right) \\ &= 2|A|_{\max} + \sum_{t=4}^{T-1} \langle \mathbf{x}_t - \mathbf{x}_{t+1}, -A\mathbf{y}_t + A\mathbf{y}_{t-1} \rangle + \langle \mathbf{x}_4 - \mathbf{x}^*, A\mathbf{y}_3 - A\mathbf{y}_2 \rangle \\ &\quad + \langle \mathbf{x}_T - \mathbf{x}^*, -A\mathbf{y}_T + A\mathbf{y}_{T-1} \rangle + \frac{1}{\eta} \sum_{t=4}^T \left( D(\mathbf{x}^*, \mathbf{x}_{t-1}) - D(\mathbf{x}^*, \mathbf{x}_t) - D(\mathbf{x}_t, \mathbf{x}_{t-1}) \right) \\ &\leq 10|A|_{\max} + \sum_{t=4}^{T-1} \langle \mathbf{x}_t - \mathbf{x}_{t+1}, -A\mathbf{y}_t + A\mathbf{y}_{t-1} \rangle \\ &\quad + \frac{1}{\eta} \sum_{t=4}^T \left( D(\mathbf{x}^*, \mathbf{x}_{t-1}) - D(\mathbf{x}^*, \mathbf{x}_t) - D(\mathbf{x}_t, \mathbf{x}_{t-1}) \right) \\ &\leq 10|A|_{\max} + \sum_{t=4}^{T-1} \|\mathbf{x}_t - \mathbf{x}_{t+1}\|_1 \cdot |A|_{\max} \cdot \|\mathbf{y}_t - \mathbf{y}_{t-1}\|_1 \\ &\quad + \frac{1}{\eta} \left( D(\mathbf{x}^*, \mathbf{x}_3) - D(\mathbf{x}^*, \mathbf{x}_T) \right) + \sum_{t=4}^T \frac{-1}{\eta} D(\mathbf{x}_t, \mathbf{x}_{t-1}) \\ &\leq 10|A|_{\max} + \frac{1}{2} \sum_{t=4}^{T-1} \left( |A|_{\max} \cdot \|\mathbf{x}_t - \mathbf{x}_{t+1}\|_1^2 + |A|_{\max} \cdot \|\mathbf{y}_t - \mathbf{y}_{t-1}\|_1^2 \right) \end{aligned}$$

$$+ \frac{1}{\eta} \left( D(\mathbf{x}^*, \mathbf{x}_3) - D(\mathbf{x}^*, \mathbf{x}_T) \right) + \sum_{t=4}^T \frac{-1}{\eta} D(\mathbf{x}_t, \mathbf{x}_{t-1}).$$

Using the fact that  $\psi$  is 1-strongly convex with respect to the  $\ell_1$ -norm, we have  $-D(\mathbf{x}, \mathbf{x}') \leq -\frac{1}{2} \|\mathbf{x} - \mathbf{x}'\|_1^2 \leq 0$ . Also, we have  $D(\mathbf{x}^*, \mathbf{x}_3) \leq \log m$ . Combining these facts in the last inequality gives:

$$\begin{aligned} \mathbf{R}_T^{\mathbf{x}} &\leq 10|A|_{\max} + \frac{\log m}{\eta} + \frac{|A|_{\max}}{2} \sum_{t=4}^{T-1} \|\mathbf{x}_t - \mathbf{x}_{t+1}\|_1^2 \\ &\quad + \frac{|A|_{\max}}{2} \sum_{t=4}^{T-1} \|\mathbf{y}_t - \mathbf{y}_{t-1}\|_1^2 - \frac{1}{2\eta} \sum_{t=4}^T \|\mathbf{x}_{t-1} - \mathbf{x}_t\|_1^2. \end{aligned}$$

Similarly, for the second player we define

$$\mathbf{R}_T^{\mathbf{y}} := \sum_{t=3}^T \langle \mathbf{y}_t - \mathbf{y}^*, A^\top \mathbf{x}_t \rangle \quad (\text{B.5})$$

where  $\mathbf{y}^* := \arg \min_{\mathbf{y}} \left\langle \mathbf{y}, A^\top \left( \frac{1}{T-2} \sum_{t=3}^T \mathbf{x}_t \right) \right\rangle$ . We then have

$$\begin{aligned} \mathbf{R}_T^{\mathbf{y}} &\leq 10|A|_{\max} + \frac{\log n}{\eta} + \frac{|A|_{\max}}{2} \sum_{t=4}^{T-1} \|\mathbf{y}_t - \mathbf{y}_{t+1}\|_1^2 \\ &\quad + \frac{|A|_{\max}}{2} \sum_{t=4}^{T-1} \|\mathbf{x}_t - \mathbf{x}_{t-1}\|_1^2 - \frac{1}{2\eta} \sum_{t=4}^T \|\mathbf{y}_{t-1} - \mathbf{y}_t\|_1^2. \end{aligned}$$

Setting  $\eta = \frac{1}{2|A|_{\max}}$ , we get

$$\mathbf{R}_T^{\mathbf{x}} + \mathbf{R}_T^{\mathbf{y}} \leq (20 + \log m + \log n) |A|_{\max}. \quad (\text{B.6})$$

Now, recalling that  $\mathbf{z}_T = \frac{\sum_{t=3}^T \mathbf{x}_t}{T-2}$  and  $\mathbf{w}_T = \frac{\sum_{t=3}^T \mathbf{y}_t}{T-2}$  and using the definition of  $\mathbf{R}_T^{\mathbf{x}}$  and  $\mathbf{R}_T^{\mathbf{y}}$ , we get

$$\frac{1}{T-2} (\mathbf{R}_T^{\mathbf{x}} + \mathbf{R}_T^{\mathbf{y}}) = \max_{\mathbf{x} \in \Delta_m} \langle \mathbf{x}, A\mathbf{w}_T \rangle - \min_{\mathbf{y} \in \Delta_n} \langle \mathbf{z}_T, A\mathbf{y} \rangle. \quad (\text{B.7})$$

Furthermore, by the definition of the value of the game, we have

$$\min_{\mathbf{y} \in \Delta_n} \langle \mathbf{z}_T, A\mathbf{y} \rangle \leq V \leq \max_{\mathbf{x} \in \Delta_m} \langle \mathbf{x}, A\mathbf{w}_T \rangle. \quad (\text{B.8})$$

We also trivially have

$$\min_{\mathbf{y} \in \Delta_n} \langle \mathbf{z}_T, A\mathbf{y} \rangle \leq \langle \mathbf{z}_T, A\mathbf{w}_T \rangle \leq \max_{\mathbf{x} \in \Delta_m} \langle \mathbf{x}, A\mathbf{w}_T \rangle. \quad (\text{B.9})$$

Combining (B.7) - (B.9) in (B.6) then establishes (4):

$$|V - \langle \mathbf{z}_T, A\mathbf{w}_T \rangle| \leq \frac{(20 + \log m + \log n) |A|_{\max}}{T-2}.$$

We now turn to (3).

Let  $\mathbf{R}_T^{\mathbf{z}} := \max_{\mathbf{z} \in \Delta_m} \sum_{t=3}^T \langle \mathbf{z}_t - \mathbf{z}, -A\mathbf{w}_t \rangle$  and let  $\tilde{\mathbf{R}}_T^{\mathbf{z}} := \sum_{t=3}^T \langle \mathbf{z}_t - \mathbf{z}_t^*, -A\mathbf{w}_t \rangle$  where  $\mathbf{z}_t^* = \arg \min_{\mathbf{z} \in \Delta_m} \langle \mathbf{z}, -A\mathbf{w}_t \rangle$ . Evidently we have  $\mathbf{R}_T^{\mathbf{z}} \leq \tilde{\mathbf{R}}_T^{\mathbf{z}}$ . Notice that (with  $\mathbf{w}_t^*$  similarly defined)

$$\begin{aligned} \langle \mathbf{z}_t - \mathbf{z}_t^*, -A\mathbf{w}_t \rangle &= \langle \mathbf{z}_t^*, A\mathbf{w}_t \rangle - \langle \mathbf{z}_t, A\mathbf{w}_t \rangle \\ &\leq \langle \mathbf{z}_t^*, A\mathbf{w}_t \rangle - \langle \mathbf{z}_t, A\mathbf{w}_t^* \rangle \end{aligned}$$

$$\leq \frac{(20 + \log m + \log n)|A|_{\max}}{t-2} \quad (\text{B.10})$$

by (B.6) and (B.7). Using these inequalities, we get

$$\begin{aligned} \frac{1}{T-2} \mathbf{R}_T^z &\leq \frac{1}{T-2} \tilde{\mathbf{R}}_T^z = \frac{1}{T-2} \sum_{t=3}^T \langle \mathbf{z}_t - \mathbf{z}_t^*, -A\mathbf{w}_t \rangle \\ &\leq \frac{1}{T-2} \sum_{t=3}^T \frac{(20 + \log m + \log n)|A|_{\max}}{t-2} \\ &\leq \frac{(\log(T-2) + 1)(20 + \log m + \log n)|A|_{\max}}{T-2} \end{aligned}$$

which finishes the proof.  $\square$

### C. Robust Optimistic Mirror Descent

In this appendix, we prove **Theorem 3**, repeated below for convenience.

**Theorem 2** ( $O(\sqrt{T})$ -Adversarial Regret). *Suppose that  $\|\nabla f_t\|_* \leq G$  for all  $t$ . Then playing  $T$  rounds of **Algorithm 3** with  $\eta_t = \frac{1}{G\sqrt{t}}$  against an arbitrary sequence of convex functions has the following guarantee on the regret:*

$$\begin{aligned} \max_{\mathbf{x} \in \Delta_m} \sum_{t=1}^T \langle \mathbf{x}_t - \mathbf{x}, \nabla f_t(\mathbf{x}_t) \rangle &\leq G\sqrt{T} (18 + 2D^2) + GD (3\sqrt{2} + 4D) \\ &= O(\sqrt{T}). \end{aligned}$$

*Proof.* Define  $\mathbf{R}_T^{\mathbf{x}} := \sum_{t=1}^T \langle \mathbf{x}_t - \mathbf{x}^*, \nabla f_t(\mathbf{x}_t) \rangle$  where  $\mathbf{x}^* := \arg \min_{\mathbf{x} \in \Delta_m} \langle \mathbf{x}, \sum_{t=1}^T \nabla f_t(\mathbf{x}_t) \rangle$ . Let  $\tilde{\nabla}_t = 2\nabla f_t(\mathbf{x}_t) - \nabla f_{t-1}(\mathbf{x}_{t-1})$ , and let  $\eta_t = \frac{1}{\alpha\sqrt{t}}$  for some  $\alpha > 0$  to be chosen later. Then

$$\begin{aligned} \mathbf{R}_T^{\mathbf{x}} &= \sum_{t=1}^T \langle \mathbf{x}_t - \mathbf{x}^*, \nabla f_t(\mathbf{x}_t) \rangle \\ &\leq \sqrt{2}DG + \sum_{t=2}^T \langle \mathbf{x}_t - \mathbf{x}^*, \nabla f_t(\mathbf{x}_t) - \tilde{\nabla}_{t-1} \rangle + \sum_{t=2}^T \langle \mathbf{x}_t - \mathbf{x}^*, \tilde{\nabla}_{t-1} \rangle \\ &\leq \sqrt{2}DG + \sum_{t=2}^T \langle \mathbf{x}_t - \mathbf{x}^*, \nabla f_t(\mathbf{x}_t) - \nabla f_{t-1}(\mathbf{x}_{t-1}) \rangle - \sum_{t=2}^T \langle \mathbf{x}_t - \mathbf{x}^*, \nabla f_{t-1}(\mathbf{x}_{t-1}) - \nabla f_{t-2}(\mathbf{x}_{t-2}) \rangle + \sum_{t=2}^T \langle \mathbf{x}_t - \mathbf{x}^*, \tilde{\nabla}_{t-1} \rangle \\ &\leq 3\sqrt{2}DG + \sum_{t=2}^{T-1} \langle \mathbf{x}_t - \mathbf{x}_{t+1}, \nabla f_t(\mathbf{x}_t) - \nabla f_{t-1}(\mathbf{x}_{t-1}) \rangle + \sum_{t=2}^T \frac{1}{\eta_t} \left( D(\mathbf{x}^*, \tilde{\mathbf{x}}_{t-1}) - D(\mathbf{x}^*, \mathbf{x}_t) - D(\mathbf{x}_t, \tilde{\mathbf{x}}_{t-1}) \right) \\ &\leq 3\sqrt{2}DG + \sum_{t=2}^{T-1} \left( \frac{\sqrt{t}G}{9} \|\mathbf{x}_t - \mathbf{x}_{t+1}\|^2 + \frac{9G}{\sqrt{t}} \right) \\ &\quad + \alpha \sum_{t=1}^T \sqrt{t} \left( D(\mathbf{x}^*, \tilde{\mathbf{x}}_{t-1}) - D(\mathbf{x}^*, \mathbf{x}_t) - D(\mathbf{x}_t, \tilde{\mathbf{x}}_{t-1}) \right). \end{aligned}$$

Using the joint convexity of  $D(\mathbf{x}, \mathbf{y})$  in  $\mathbf{x}$  and  $\mathbf{y}$  and the strong convexity of the entropic mirror map, we get:

$$\begin{aligned} -D(\mathbf{x}_t, \tilde{\mathbf{x}}_{t-1}) &\leq -\frac{1}{2} \|\tilde{\mathbf{x}}_t - \mathbf{x}_{t+1}\|^2 \\ &\leq -\frac{1}{4} \left\| \frac{t-1}{t} (\mathbf{x}_t - \mathbf{x}_{t+1}) \right\|^2 + \frac{1}{2} \left( \frac{1}{t} \right)^2 \|\mathbf{x}_c - \mathbf{x}_{t+1}\|^2 \end{aligned}$$

$$\leq -\frac{(t-1)^2}{4t^2} \|\mathbf{x}_t - \mathbf{x}_{t+1}\|^2 + \frac{D^2}{t^2},$$

and

$$D(\mathbf{x}^*, \tilde{\mathbf{x}}_t) \leq \frac{t-1}{t} D(\mathbf{x}^*, \mathbf{x}_t) + \frac{1}{t} D(\mathbf{x}^*, \mathbf{x}_c).$$

Meanwhile, straightforward calculations show that

$$\sum_{t=2}^T \frac{D(\mathbf{x}^*, \mathbf{x}_c)}{\sqrt{t}} \leq 2D^2\sqrt{T},$$

and

$$\begin{aligned} \sum_{t=2}^T \left( \sqrt{t} \cdot \frac{t-1}{t} D(\mathbf{x}^*, \mathbf{x}_{t-1}) - \sqrt{t} D(\mathbf{x}^*, \mathbf{x}_t) \right) &\leq \sum_{t=2}^T \left( \sqrt{t-1} D(\mathbf{x}^*, \mathbf{x}_{t-1}) - \sqrt{t} D(\mathbf{x}^*, \mathbf{x}_t) \right) \\ &\leq D(\mathbf{x}^*, \mathbf{x}_1) \leq D^2. \end{aligned}$$

We can hence continue as

$$\begin{aligned} \mathbf{R}_T^{\mathbf{x}} &\leq 3\sqrt{2}DG + \sum_{t=2}^{T-1} \left( \frac{\sqrt{t}}{9} G \|\mathbf{x}_t - \mathbf{x}_{t+1}\|^2 + \frac{9G}{\sqrt{t}} \right) + 2\alpha D^2\sqrt{T} \\ &\quad + \alpha D^2 - \frac{\alpha}{4} \sum_{t=2}^T \sqrt{t} \cdot \left( \frac{t-1}{t} \right)^2 \|\mathbf{x}_{t-1} - \mathbf{x}_t\|^2 + \alpha D^2 \sum_{t=2}^T \frac{\sqrt{t}}{t^2}. \end{aligned} \tag{C.1}$$

Elementary calculations further show

$$\begin{aligned} \sum_{t=2}^{T-1} \frac{9G}{\sqrt{t}} &\leq 18G\sqrt{T}, \\ \sum_{t=2}^T \frac{1}{t\sqrt{t}} &\leq 3. \end{aligned}$$

Finally, since  $\left(\frac{t-1}{t}\right)^2 \geq \frac{4}{9}$  for  $t \geq 3$ , we can further bound (C.1) as

$$\begin{aligned} \mathbf{R}_T^{\mathbf{x}} &\leq 3\sqrt{2}DG + 18G\sqrt{T} + 2\alpha D^2\sqrt{T} + 4\alpha D^2 \\ &\quad + \left( \frac{G}{9} \sum_{t=2}^{T-1} \sqrt{t} \|\mathbf{x}_t - \mathbf{x}_{t+1}\|^2 - \frac{\alpha}{4} \cdot \frac{4}{9} \sum_{t=2}^{T-1} \sqrt{t+1} \|\mathbf{x}_t - \mathbf{x}_{t+1}\|^2 \right). \end{aligned}$$

The proof is finished by choosing  $\alpha = G$ . □

## References

- Chiang, Chao-Kai, Yang, Tianbao, Lee, Chia-Jung, Mahdavi, Mehrdad, Lu, Chi-Jen, Jin, Rong, and Zhu, Shenghuo. Online optimization with gradual variations. In *Conference on Learning Theory*, pp. 6–1, 2012.
- Rakhlin, Alexander and Sridharan, Karthik. Online learning with predictable sequences. In *Conference on Learning Theory*, pp. 993–1019, 2013.
